# Supplementary material for: The political economy of multilateral lending to European regions
Source: Springer Nature journal article supplement (doi:10.1007/s11558-020-09385-y), 2020-07-01
Supplement: MOESM2 [file 18143624]

# ONLINE APPENDIX:

## THE POLITICAL ECONOMY OF MULTILATERAL LENDING TO EUROPEAN REGIONS

ZAREH ASATRYAN\*<sup>†</sup>      ANNIKA HAVLIK\*<sup>‡</sup>  
\*ZEW Mannheim      <sup>†</sup>CESifo      <sup>‡</sup>University of Mannheim

April 27, 2020

- We use three sets of data:
  - Project-level data on EIB loans (N=15,932)<sup>1</sup>: includes the size of loans, time of commitment, region (i.e., NUTS) identifier, name of project, sector, etc.<sup>2</sup>
  - Person-level data on EIB Board of Directors (N=470): regions of workplace for all 470 Directors<sup>3</sup> and regions of education of highest degree for 262 Directors.<sup>4</sup>
  - Person-level data on EIB Management Committee (N=70): regions of workplace for 49 Directors<sup>5</sup>
  - Region-level data on socio-economic characteristics: includes GDP, population, compensation and hours worked per employee, and gross fixed capital

---

\**E-mail addresses:* zareh.asatryan@zew.de, annika.havlik@zew.de

<sup>1</sup>This is the total number of loans in the data, flowing to all different levels of regions. See also Table 1 in the manuscript for details.

<sup>2</sup>The source of this data is the EIB.

<sup>3</sup>The work region was hand-collected from 157 CVs provided by the EIB, and for the remaining 313 Directors it was complemented with data collected from EIB annual reports available in the Historical Archives of the European Union (European University Institute 2020). We have full coverage for this variable.

<sup>4</sup>The education region was likewise hand-collected via the CVs and augmented via a manual Google search. Here, we have a partial coverage of only 262 Directors.

<sup>5</sup>The work region was equally hand-collected CVs provided by the EIB.

formation;<sup>6</sup> as well as data on disbursement of European Structural and Investment Funds (European Commission 2020) and data on distances between regions (Eurostat 2020).

- We aggregate our data to the level of European regions:
  - We use the NUTS 2 level of aggregation (classification as of 2010) for our main analysis.<sup>7</sup>
  - This gives us 291 regions in total.<sup>8</sup>
  - The sample starts in 1959 and ends in 2015.
  - In total, we have a balanced sample of 16,530 observations.
  - For summary statistics see Table 1 below.
  - For robustness tests we also use data aggregated to NUTS1, NUTS3 and NUTS2-quarterly level (see do files for further details).
- Do files:
  - The do file `Asatryan_Havlik_dataprep.do`, first, aggregates the raw project- and person-level data into region-level data, and merges all necessary variables.
  - The do file `Asatryan_Havlik_descriptives.do` plots all the descriptive figures and tables of the paper.
  - The do file `Asatryan_Havlik_regressions.do` estimates all the regressions of the paper.

---

<sup>6</sup>This database is called the European Regional Database and it was purchased from Cambridge Economics.

<sup>7</sup>The countries Estonia, Latvia, and Lithuania are exceptions where we use the NUTS 3 aggregation.

<sup>8</sup>Brussels region will we dropped from the analysis (NUTS code BE10) as explained in Section 2 of the manuscript.

**Table 1: Summary statistics of variables in public data**

| Variable             | Label                                                                         | Obs    | Mean    | Std.Dev. | Min  | Max   |
|----------------------|-------------------------------------------------------------------------------|--------|---------|----------|------|-------|
| year                 | year                                                                          | 16,530 | 1987    | 16.45    | 1959 | 2015  |
| nuts_code            | NUTS code, string                                                             |        |         |          |      |       |
| nuts_code_panel      | NUTS code for panel ID                                                        | 16,530 | 145.5   | 83.72    | 1    | 290   |
| country_code         | Country code, string                                                          |        |         |          |      |       |
| country_code_panel   | Country code for panel ID                                                     | 16,530 | 14.64   | 8.408    | 1    | 28    |
| analysis             | Region-time level used for analysis                                           |        |         |          |      |       |
| first_year_work_full | First year at EIB, work region, Full member                                   | 16,530 | 0.0126  | 0.111    | 0    | 1     |
| last_year_work_full  | Last year at EIB, work region, Full member                                    | 16,530 | 0.0128  | 0.113    | 0    | 1     |
| max_office_work_full | Number of years at EIB, work region, Full member, maximum for several people  | 730    | 5.421   | 3.978    | 1    | 22    |
| first_year_work_alt  | First year at EIB, work region, Alternate member                              | 16,530 | 0.00938 | 0.0964   | 0    | 1     |
| last_year_work_alt   | Last year at EIB, work region, Alternate member                               | 16,530 | 0.00980 | 0.0985   | 0    | 1     |
| max_office_work_alt  | Number of years at EIB, work region, Alt. member, maximum for several people  | 468    | 4.737   | 3.621    | 1    | 21    |
| first_year_educ_full | First year at EIB, educ. region, Full member                                  | 16,530 | 0.00901 | 0.0945   | 0    | 1     |
| last_year_educ_full  | Last year at EIB, educ. region, Full member                                   | 16,530 | 0.00907 | 0.0948   | 0    | 1     |
| max_office_educ_full | Number of years at EIB, educ. region, Full member, maximum for several people | 597    | 4.363   | 3.351    | 1    | 19    |
| first_year_educ_alt  | First year at EIB, educ. region, Alternate member                             | 16,530 | 0.00581 | 0.0760   | 0    | 1     |
| last_year_educ_alt   | Last year at EIB, educ. region, Alternate member                              | 16,530 | 0.00551 | 0.0740   | 0    | 1     |
| max_office_educ_alt  | Number of years at EIB, educ. region, Alt. member, maximum for several people | 276    | 2.866   | 1.932    | 1    | 13    |
| max_office_work      | Number of years at EIB, work region, maximum for several people               | 813    | 5.748   | 4.070    | 1    | 22    |
| max_office_educ      | Number of years at EIB, educ. region, maximum for several people              | 751    | 4.185   | 3.163    | 1    | 19    |
| first_year_work      | First year at EIB, work region                                                | 16,530 | 0.0180  | 0.133    | 0    | 1     |
| last_year_work       | Last year at EIB, work region                                                 | 16,530 | 0.0178  | 0.132    | 0    | 1     |
| first_year_educ      | First year at EIB, education region                                           | 16,530 | 0.0137  | 0.116    | 0    | 1     |
| last_year_educ       | Last year at EIB, education region                                            | 16,530 | 0.0130  | 0.113    | 0    | 1     |
| max_reg_start_work   | Number of years in region when starting at EIB, max. for several people       | 16,530 | 0.145   | 1.458    | 0    | 33.36 |
| treated_work         | Work region dummy                                                             | 16,530 | 0.0492  | 0.216    | 0    | 1     |
| treated_educ         | Education region dummy                                                        | 16,530 | 0.0454  | 0.208    | 0    | 1     |
| cat_exp              | Number of years in region when starting at EIB, in 3-year intervals           | 16,530 | 0.0474  | 0.394    | 0    | 5     |

**Table 1:** Summary statistics of variables in public data (continued)

| Variable             | Label                                                                    | Obs    | Mean      | Std.Dev.  | Min   | Max       |
|----------------------|--------------------------------------------------------------------------|--------|-----------|-----------|-------|-----------|
| treated_work_reduced | Work region dummy with both regions known                                | 16,530 | 0.0319    | 0.176     | 0     | 1         |
| treated_educ_reduced | Education region dummy with both regions known                           | 16,530 | 0.0454    | 0.208     | 0     | 1         |
| first_year_old       | First year at EIB, pre-EIB region                                        | 16,530 | 0.00278   | 0.0527    | 0     | 1         |
| last_year_old        | Last year at EIB, pre-EIB region                                         | 16,530 | 0.00272   | 0.0521    | 0     | 1         |
| max_office_old       | Number of years at EIB, pre-EIB region, maximum for several people       | 152    | 3.303     | 1.993     | 1     | 10        |
| first_year_post      | First year at EIB, post-EIB region                                       | 16,530 | 0.00200   | 0.0446    | 0     | 1         |
| last_year_post       | Last year at EIB, post-EIB region                                        | 16,530 | 0.00206   | 0.0453    | 0     | 1         |
| max_office_post      | Number of years at EIB, post-EIB region, maximum for several people      | 115    | 3.504     | 2.075     | 1     | 10        |
| MC_first_year_work   | First year at EIB, Management Committee, work region                     | 16,530 | 0.00248   | 0.0497    | 0     | 1         |
| MC_last_year_work    | Last year at EIB, Management Committee, work region                      | 16,530 | 0.00194   | 0.0440    | 0     | 1         |
| max_mc_office_work   | Number of years at EIB, Management Committee, maximum for several people | 235    | 5.591     | 4.681     | 1     | 24        |
| MC_first_year_educ   | First year at EIB, Management Committee, education region                | 16,530 | 0.00212   | 0.0460    | 0     | 1         |
| MC_last_year_educ    | Last year at EIB, Management Committee, education region                 | 16,530 | 0.00157   | 0.0396    | 0     | 1         |
| max_mc_office_educ   | Number of years at EIB, Management Committee, maximum for several people | 186    | 4.726     | 3.740     | 1     | 19        |
| sum_loans            | EIB loans in million euros                                               | 16,530 | 28.70     | 99.26     | 0     | 1874      |
| iqr_loans            | Interquartile range of loans per region-year                             | 4,148  | 2.550e+07 | 5.860e+07 | 0     | 9.850e+08 |
| sd_loans             | Standard deviation of loans per region-year                              | 2,418  | 3.220e+07 | 4.890e+07 | 0     | 6.970e+08 |
| gdp                  | Billions of euros, 2005 constant prices, ERD                             | 9,251  | 35.57     | 45.27     | 0.271 | 565.0     |
| population           | Thousands of people, ERD                                                 | 9,249  | 1694      | 1477      | 22.76 | 12070     |
| gva                  | Gross value added, millions of euros in 2005 constant prices, ERD        | 9,251  | 31915     | 40913     | 99.52 | 511771    |

**Table 1:** Summary statistics of variables in public data (continued)

| Variable                      | Label                                                                         | Obs    | Mean    | Std.Dev. | Min    | Max    |
|-------------------------------|-------------------------------------------------------------------------------|--------|---------|----------|--------|--------|
| active_population             | Employed+unemployed pop. minus students+pensioners, living place measure, ERD | 8,723  | 842.7   | 710.6    | 8.169  | 6008   |
| employment                    | Thousands of people, workplace measure, ERD                                   | 9,251  | 734.5   | 666.2    | 11.03  | 6115   |
| hours_worked                  | Total annual hours worked, in million, ERD                                    | 8,686  | 1310    | 1150     | 19.43  | 9572   |
| compensation_employees        | Total remuneration of employees, million euros in 2005 prices, ERD            | 8,726  | 18236   | 21533    | 219.6  | 246062 |
| gross_fixed_capital_formation | Million euros in 2005 prices, ERD                                             | 8,736  | 7763    | 9279     | 46.97  | 124611 |
| ln_population                 | Ln population                                                                 | 9,249  | 13.98   | 0.927    | 10.03  | 16.31  |
| compensation_employees_1000pc | Compensation per employee, in 2005 constant 1000 euros                        | 8,726  | 22.59   | 10.64    | 1.162  | 105.7  |
| hours1000_worked_pc           | 1000 hours worked per employee                                                | 8,686  | 1.718   | 0.204    | 1.293  | 2.456  |
| ln_gfcf                       | Ln gross fixed capital formation                                              | 8,736  | 22.26   | 1.102    | 17.66  | 25.55  |
| ln_gdp                        | Ln GDP                                                                        | 9,251  | 23.67   | 1.251    | 19.42  | 27.06  |
| gdp_mio                       | GDP, millions of euros, 2005 constant prices                                  | 9,251  | 35569   | 45274    | 271    | 564982 |
| gdp_pc                        | GDP per capita, 2005 constant prices                                          | 9,249  | 19435   | 10442    | 1585   | 98787  |
| gdp_pc_mov_avg_5yr            | GDP p.c. from t-6 to t-1                                                      | 8,960  | 18822   | 10118    | 1708   | 96309  |
| ln_gdp_pc_mov_avg_5yr         | Ln GDP p.c. from t-6 to t-1                                                   | 8,960  | 9.652   | 0.698    | 7.443  | 11.48  |
| ln_sum_eu_payments            | Ln sum of European Structural and Investment Funds                            | 16,530 | 6.474   | 8.479    | 0      | 21.60  |
| capital_city                  | capital                                                                       | 16,530 | 0.100   | 0.300    | 0      | 1      |
| year_joining_EU               | year_joining_EU                                                               | 1,653  | 1989    | 17.81    | 1959   | 2013   |
| capital_joinEU                | Value=1 if nuts region is capital city and after joining EU                   | 16,530 | 0.0457  | 0.209    | 0      | 1      |
| loan_dummy                    | EIB loan dummy                                                                | 16,530 | 0.251   | 0.434    | 0      | 1      |
| share_loans                   | Share of regional loans in total loans in given year                          | 16,530 | 0.00345 | 0.0148   | 0      | 0.471  |
| ln_loans_nozeros              | Ln EIB loans without zeros                                                    | 4,148  | 3.797   | 1.546    | -2.717 | 7.536  |
| share_loans_gdp               | Share of loans in GDP                                                         | 9,251  | 0.00139 | 0.00397  | 0      | 0.0733 |
| spl_treated_work              | Spatial lag (dist) EIB directors                                              | 16,473 | 0.0525  | 0.0298   | 0.0132 | 0.198  |

## References

European Commission (2020). European Structural and Investment Funds Data. <https://cohesiondata.ec.europa.eu/> [Accessed in 2018].

European University Institute (2020). Historical Archives of the European Union: Banque européenne d'investissement. <https://archives.eui.eu/en/fonds/30462?item=BEI> [Accessed in 2016].

Eurostat (2020). Distances between NUTS regions. <https://ec.europa.eu/eurostat/tercet/flatfiles.do> [Accessed in 2018].
